# Supplementary material
Source: Springer Nature journal article supplement (https://www.springermedizin.de/resource/supplementary/12884_2014_1060_MOESM1_ESM.pdf/9458844)
Supplement: MOESM1 [file 9458844]

1826 expected pregnancies

ADVANCE DISTRIBUTION OF MISOPROSTOL

DELIVERY

766 received at ANC

214 received from DRHS at home

846 did not receive misoprostol

692 delivered at a health facility\*

1,091 delivered at home\*\*

78.2%

21.8%

37.9%\*

58.4%

**53.7% advance distribution rate**  
**980/1826 received misoprostol prior to birth**

16 no uterotonic

676 received a uterotonic (oxytocin)

265 received a uterotonic (misoprostol)

801 no uterotonic

**97.7% use of a uterotonic at facility birth**

**24.9% use of a uterotonic at home birth**

**53.5% uterotonic coverage rate**  
**941/1758\* births received a uterotonic immediately after birth**
